# Supplementary material
Source: publisher site journal article supplement (https://www.spandidos-publications.com/1710/downloadSupplementary)

Figure S1. Representative images of TERT promoter status. (A) TERT promoter wild type. (B) TERT promoter mutation (C228T). TERT, telomerase reverse transcriptase.

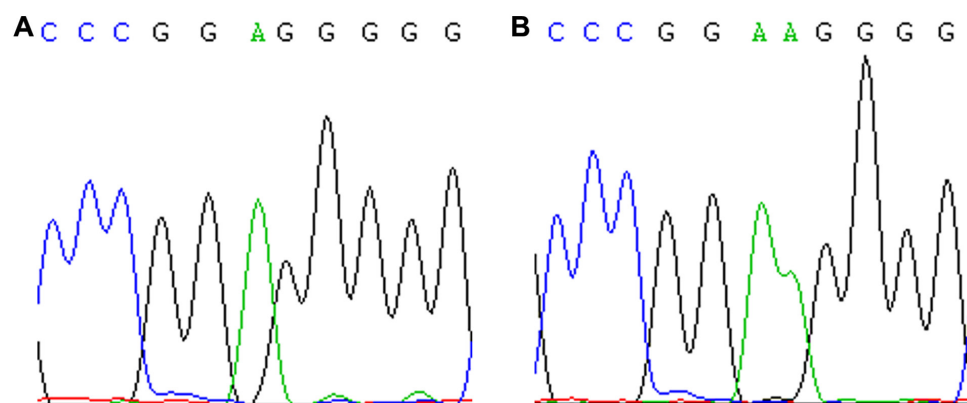

Figure S2. Prognostic value of IDH1 and TERT promoter. IDH1 expression over 10% was defined as high IDH1 group (IDH<sup>+</sup>), and expression less than 10% was defined as low IDH1 group (IDH<sup>-</sup>). TERTp existing C228T mutation was defined as TERTp<sup>+</sup>. Whereas, it was defined as TERTp<sup>-</sup>. (A) Kaplan-Meier analysis of IDH1 mutation in HGG (P=0.048). (B) Kaplan-Meier analysis of TERTp mutation in HGG (P=0.004). IDH 1, isocitrate dehydrogenase 1; TERTp, telomerase reverse transcriptase promoter; HGG, high-grade glioma.

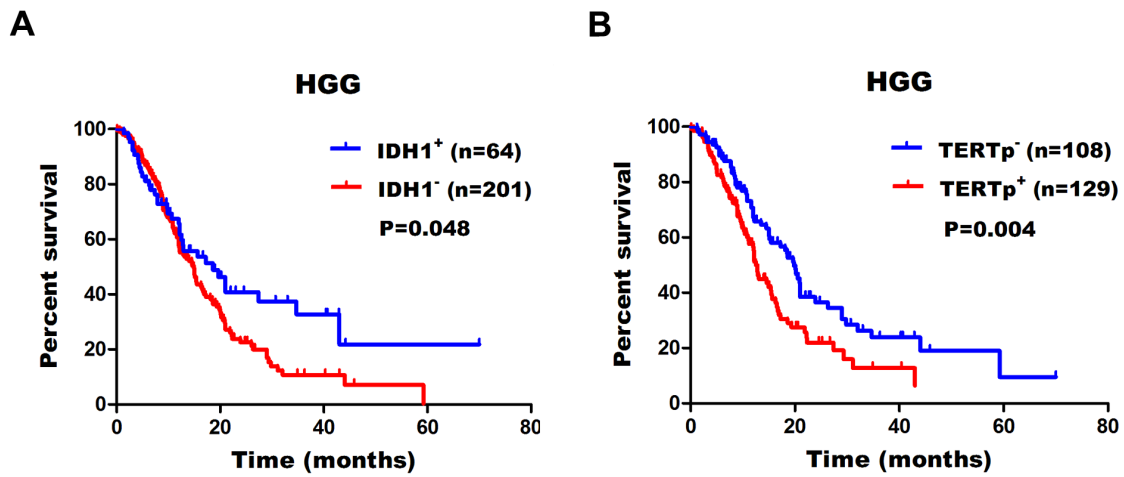

Supplement: Supplementary file 1 [file downloadSupplementary]
